# Supplementary material for: CO2-triggered reversible phase transfer of graphene quantum dots for visible light-promoted amine oxidation
Source: Royal Society of Chemistry journal article supplement (doi:10.1039/c9nr10195k), 2020-01-01
Supplement: c9nr10195k1.pdf [file c9nr10195k1.pdf]

## Electronic Supporting Information

### CO<sub>2</sub>-Triggered Reversible Phase Transfer of Graphene Quantum Dots for Visible Light-Promoted Amines Oxidation

Xianjun Tu,<sup>a</sup> Qin Wang,<sup>a</sup> Feng Zhang,<sup>a</sup> Fang Lan,<sup>a</sup> Hongbo Liu,<sup>a</sup> Run Li\*<sup>a</sup>

<sup>a</sup>College of Material Science and Engineering, Hunan University, Hunan, Changsha  
410082 (P. R. China),  
E-mail: lirun@hnu.edu.cn

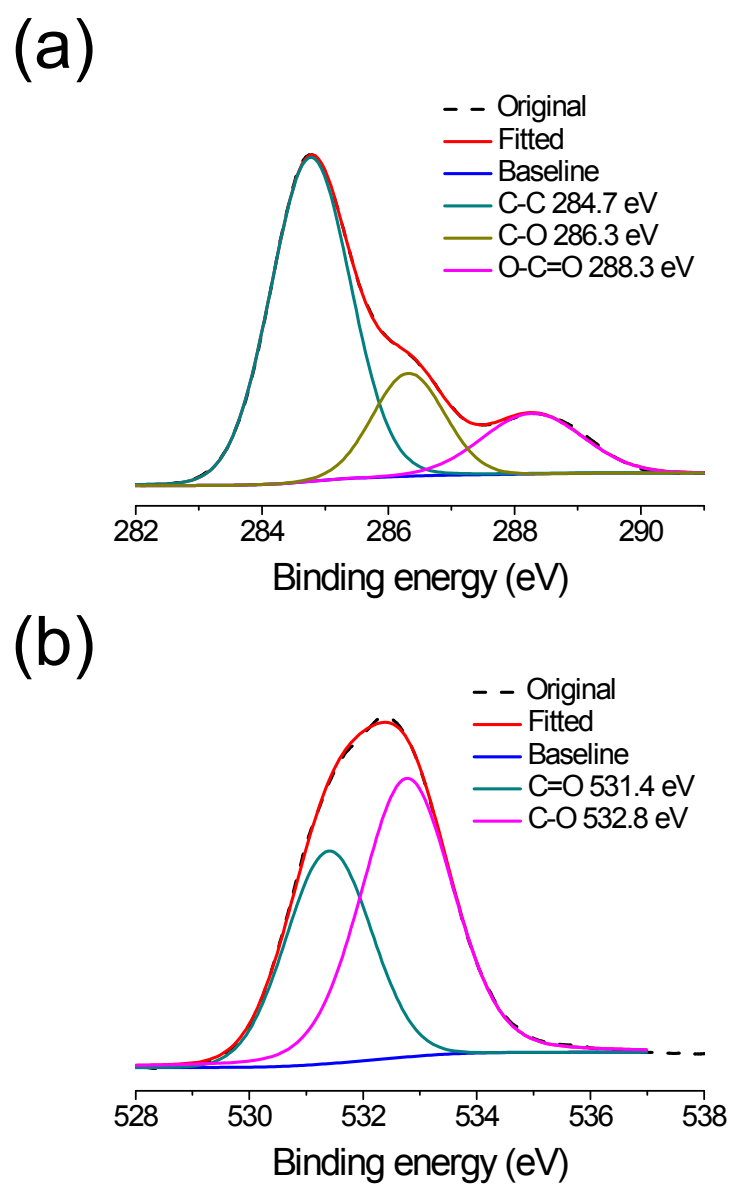

**Fig. S1** High-resolution C 1s (a) and O 1s (b) XPS spectra of GQD-COOH.

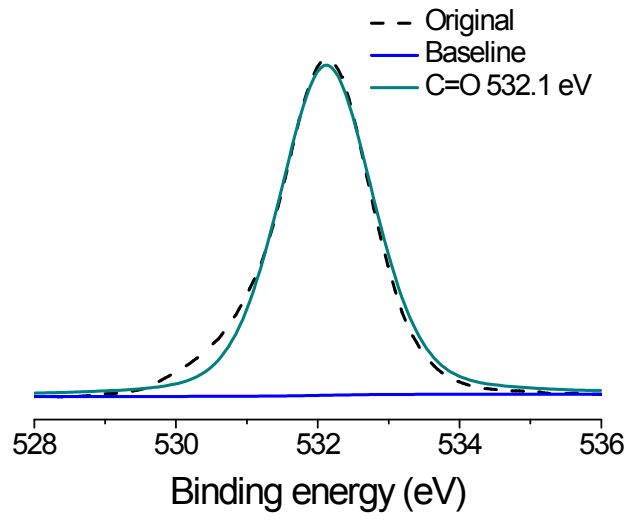

**Fig. S2** High-resolution O 1s (c) XPS spectra of GQD-DMA.

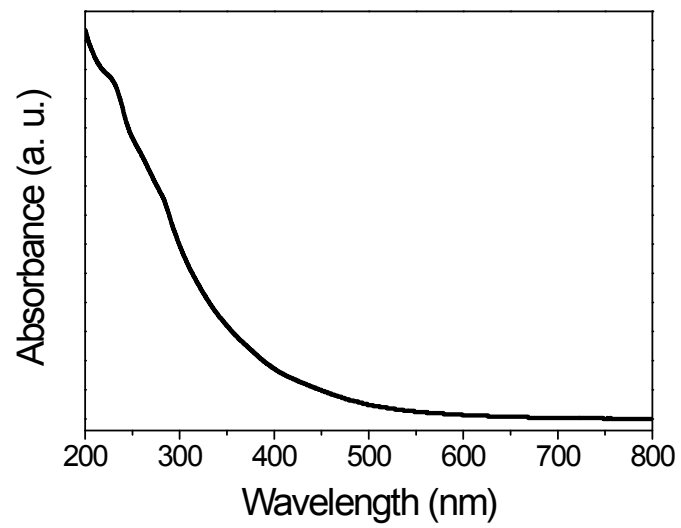

**Fig. S3** UV-Vis spectra of GQD-COOH.

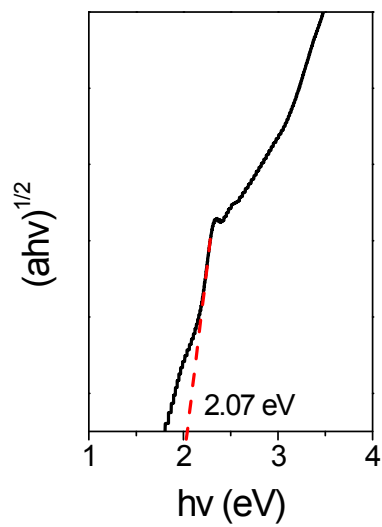

**Fig.S4** Kubelka–Munk plot of  $(\alpha E)^{1/2}$  against photon energy (E) for GQD-DMA.

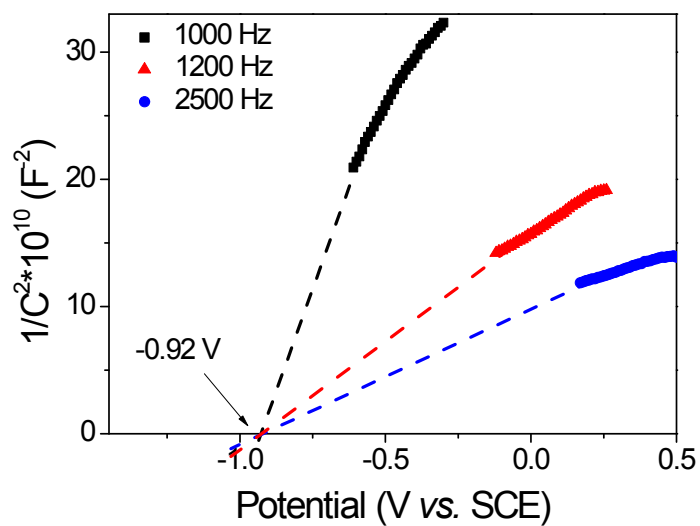

**Fig. S5** Mott-Schottky plots of GQD-DMA in acetonitrile.

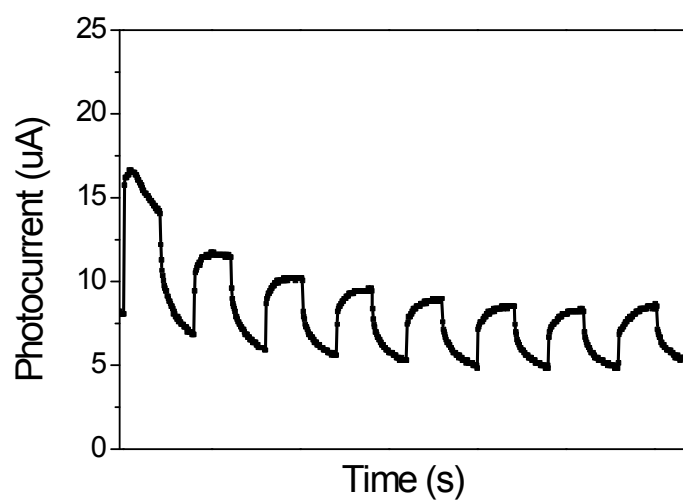

**Fig. S6** Photocurrent responses upon switching the light (blue LED,  $\lambda=420$  nm) on and off

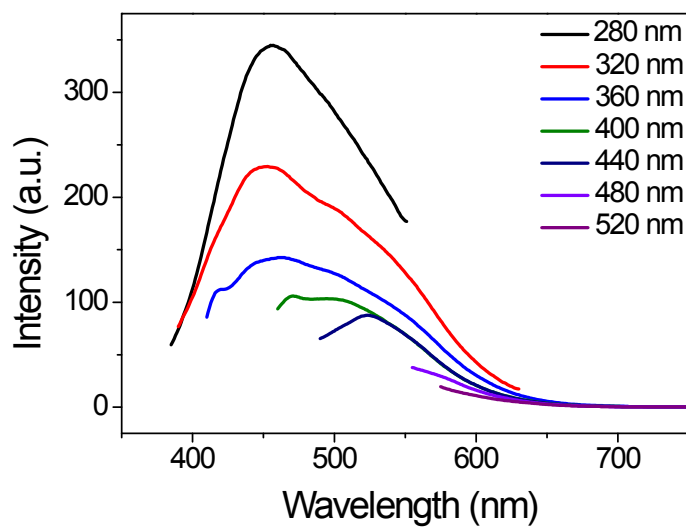

**Fig. S7** Steady-state fluorescence spectra of GQD-COOH under different excitation wavelength from 280 nm to 520 nm.

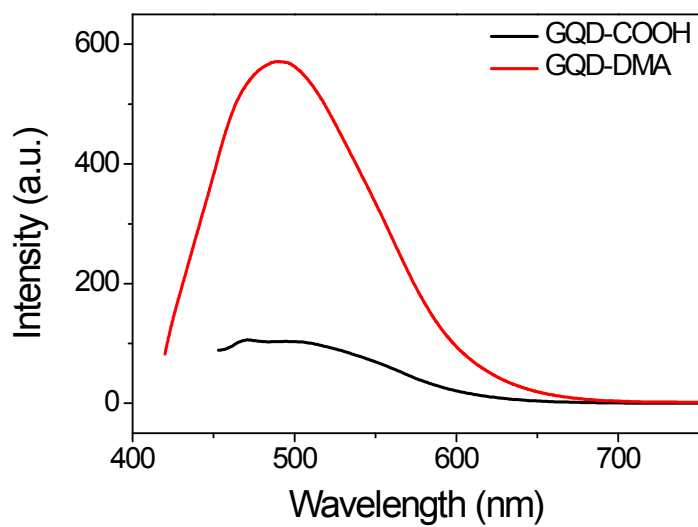

**Fig. S8** Steady-state fluorescence spectra of GQD-COOH and GQD-DMA excited at 400 nm.

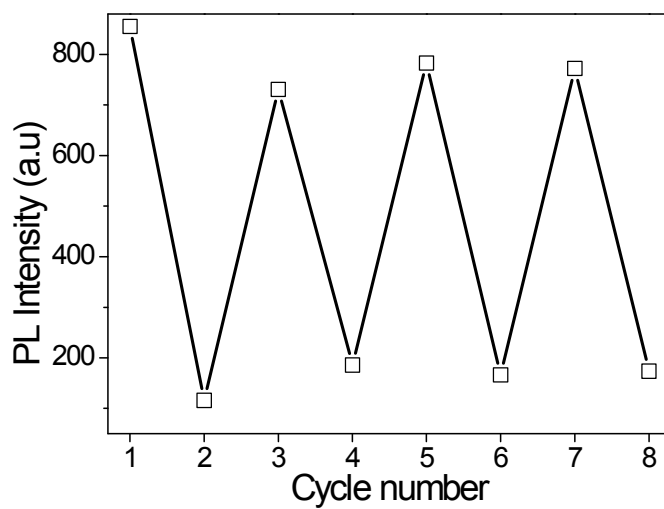

**Fig. S9** Photoluminescence intensity change of GQD-DMA in CH<sub>2</sub>Cl<sub>2</sub> phase by alternatively bubbling CO<sub>2</sub> and removal of CO<sub>2</sub>.

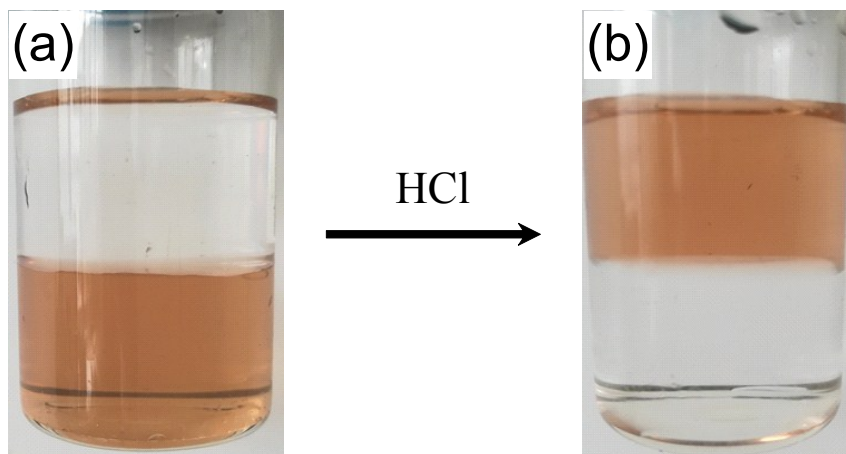

**Fig. S10** Photograph of GQD-DMA in  $\text{CH}_2\text{Cl}_2$  and water mixture taken under natural light before (a) and after (b) adding diluted HCl solution.

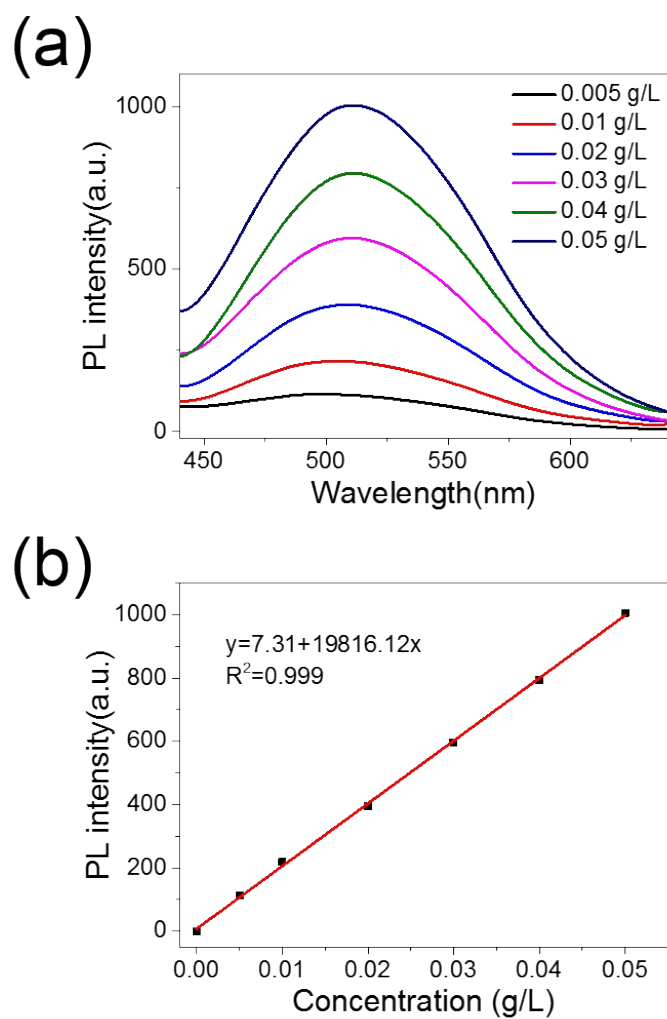

**Fig. S11** (a) Emission spectra of GQD-DMA with different concentration and (b) change of emission intensity as a function of the concentration of graphene quantum dot in dichloromethane. Excited at 420 nm.



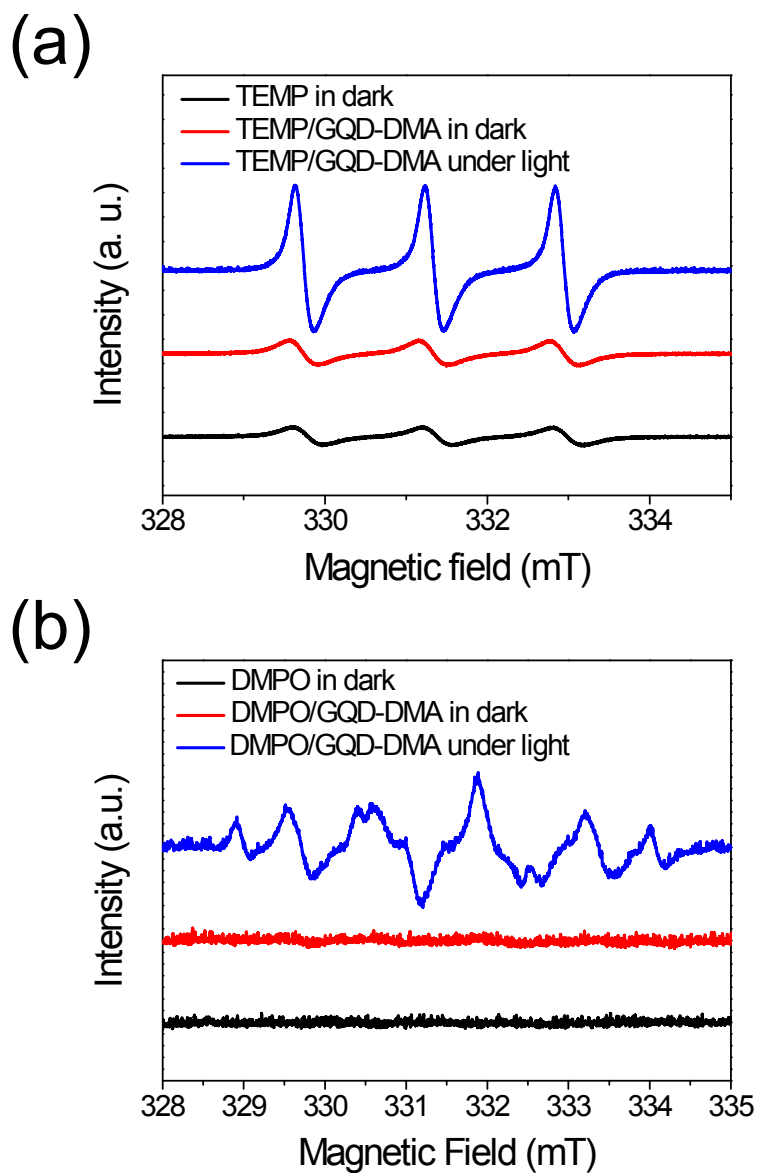

**Fig. S12** EPR spectra of TEMP- $^1\text{O}_2$  (a) and DMPO- $\text{O}_2^{\cdot-}$  adducts (b) using GQD-DMA as photocatalyst in dark and under light irradiation.

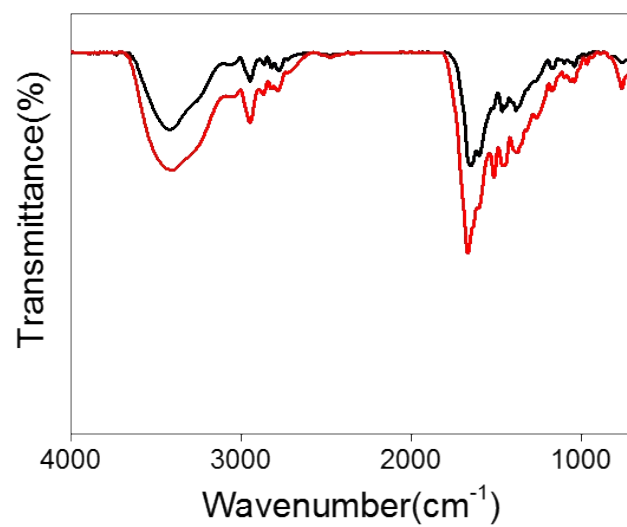

**Fig. S13** FTIR spectra of GQD-DMA before (black) and after (red) photocatalysis reaction.
